# Supplementary material
Source: PubMed Central journal article supplement (PMC5247311)
Supplement: NIHMS838220-supplement-1.pdf [file NIHMS838220-supplement-1.pdf]

## Supplementary Online Content

Klassen AF, Cano SJ, Grotting JC, et al. FACE-Q Eye Module for measuring patient-reported outcomes following cosmetic eye treatments. *JAMA Facial Plast Surg*. Published online September 15, 2016. doi:10.1001/jamafacial.2016.1018

**eTable 1.** Number (%) from 96 post-operative blepharoplasty patients to report being bothered for each item

**eTable 2.** FACE-Q Satisfaction with Eyes Interpretation Table

This supplementary material has been provided by the authors to give readers additional information about their work.

**eTable 1: Number (%) from 96 post-operative blepharoplasty patients to report being bothered for each item**

| <b>Item</b>                                               | <b>Not at all</b> | <b>A little</b> | <b>Moderately</b> | <b>Extremely</b> | <b>Missing</b> |
|-----------------------------------------------------------|-------------------|-----------------|-------------------|------------------|----------------|
| How your eyelid scars look (obvious, noticeable, uneven)? | 60 (62.5)         | 30 (31.3)       | 6 (6.3)           | 0                | 0              |
| Dry eyes?                                                 | 62 (64.6)         | 22 (22.9)       | 10 (10.4)         | 2 (2.1)          | 0              |
| Eye irritation (e.g. redness, itching)?                   | 63 (65.6)         | 24 (25.0)       | 8 (8.3)           | 0                | 1 (1.0)        |
| Excessive tearing?                                        | 71 (74.0)         | 17 (17.7)       | 4 (4.2)           | 3 (3.1)          | 1 (1.0)        |
| Your eyes looking hollowed out?                           | 84 (87.5)         | 8 (8.3)         | 2 (2.1)           | 0                | 2 (2.1)        |
| Difficulty closing your eyes?                             | 92 (95.8)         | 4 (4.2)         | 0                 | 0                | 0              |

**eTable 2: FACE-Q Satisfaction with Eyes Interpretation Table**

|                       | <b>Very Dissatisfied</b> | <b>Somewhat Dissatisfied</b> | <b>Somewhat Satisfied</b> | <b>Very Satisfied</b> |
|-----------------------|--------------------------|------------------------------|---------------------------|-----------------------|
| <b>...shape</b>       | 0-21                     | 21-38                        | 38-66                     | 66-100                |
| <b>...attractive</b>  | 0-18                     | 18-46                        | 46-79                     | 79-100                |
| <b>...alert</b>       | 0-25                     | 25-53                        | 53-73                     | 73-100                |
| <b>...open</b>        | 0-27                     | 27-46                        | 46-77                     | 77-100                |
| <b>...bright-eyed</b> | 0-19                     | 19-50                        | 50-83                     | 83-100                |
| <b>...nice</b>        | 0-24                     | 24-52                        | 52-81                     | 81-100                |
| <b>...youthful</b>    | 0-28                     | 28-59                        | 59-87                     | 87-100                |

**Note:** The Interpretation Table shows the implied range of scores for each and every item/response option. This table is itself based directly on the threshold plots produced through the Rasch analysis. Users of this table can take mean transformed FACE-Q scores (or individual scores) and cross reference the numbers in the table to ascertain better interpretation.
